# Supplementary material for: Hydrolytic Enzymes Producing Bacterial Endophytes of Some Poaceae Plants
Source: PubMed Central journal article supplement — Pol J Microbiol. 2021 Sep 17;70(3):297–304. doi: 10.33073/pjm-2021-026 (PMC8456377; doi:10.33073/pjm-2021-026), 2021-09-17
Supplement: 10.33073_pjm-70-3-026_Supplementary.pdf [file 10.33073_pjm-70-3-026_Supplementary.pdf]

Supplementary materials for the article:

Dogan G, Taskin B. Hydrolytic Enzymes Producing Bacterial Endophytes of Some Poaceae Plants  
Pol J Microbiol. 2021, Vol. 70, No 3, 297–304.

Table SI

Protease, lipase, amylase, cellulase, pectinase and xylanase enzyme indexes (EIs) of 128 strains. EIs were calculated as a mean ratio of opaque zone diameter to colony diameter in mm.

| ISOLATE /ENZYME | PROTEASE                              | LIPASE                                  | AMYLASE                        | CELLULASE                   | PECTINASE                  | XYLANASE                  |
|-----------------|---------------------------------------|-----------------------------------------|--------------------------------|-----------------------------|----------------------------|---------------------------|
| G100K1          | 2.92 ± 0.11 <sup>abcqrstuvwxyz</sup>  | -                                       | -                              | -                           | -                          | -                         |
| G100S1          | 2.40 ± 0.03 <sup>abcdefgxyz</sup>     | 1.65 ± 0.17 <sup>abuvwxyz</sup>         | 1.36 ± 0.04 <sup>abxyz</sup>   | -                           | -                          | -                         |
| G100Y1          | 3.40 ± 0.12 <sup>ijklmnopqrstuv</sup> | 6.96 ± 0.54 <sup>b</sup>                | 2.18 ± 0.08 <sup>lmnopq</sup>  | 7.02 ± 0.46 <sup>def</sup>  | -                          | -                         |
| G100Y2          | 3.02 ± 0.32 <sup>opqrstuvwxy</sup>    | 1.84 ± 0.07 <sup>abstuvwxyz</sup>       | 1.36 ± 0.08 <sup>abxyz</sup>   | -                           | -                          | -                         |
| G100Y3          | 2.81 ± 0.03 <sup>abcedrstuvwxyz</sup> | 3.02 ± 0.25 <sup>ijklmnopqrstu</sup>    | 1.61 ± 0.05 <sup>tuvwxyz</sup> | -                           | -                          | -                         |
| G101K1          | 1.88 ± 0.12 <sup>ghijk</sup>          | 2.42 ± 0.18 <sup>abmnopqrstuvwxyz</sup> | 3.17 ± 0.21 <sup>de</sup>      | 4.55 ± 0.95 <sup>ghij</sup> | -                          | -                         |
| G101Y1          | 2.86 ± 0.08 <sup>abcdqrstuvwxyz</sup> | 3.44 ± 0.29 <sup>ghijklmno</sup>        | 1.67 ± 0.12 <sup>stuvwxy</sup> | -                           | -                          | -                         |
| G101Y2          | -                                     | 5.63 ± 0.38 <sup>cd</sup>               | -                              | -                           | -                          | -                         |
| G101Y3          | 1.95 ± 0.07 <sup>ghijk</sup>          | 1.90 ± 0.05 <sup>abstuvwxyz</sup>       | -                              | -                           | -                          | -                         |
| G101Y4          | 3.25 ± 0.12 <sup>klmnopqrstuv</sup>   | 2.05 ± 0.05 <sup>abqrstuvwxyz</sup>     | -                              | -                           | -                          | -                         |
| G102K1          | 1.62 ± 0.03 <sup>ijk</sup>            | -                                       | -                              | -                           | -                          | -                         |
| G102K2          | 2.26 ± 0.08 <sup>abcdefgxyz</sup>     | 7.00 ± 0.68 <sup>b</sup>                | -                              | -                           | -                          | -                         |
| G102K3          | 4.07 ± 0.37 <sup>defghi</sup>         | -                                       | -                              | -                           | 3.39 ± 0.15 <sup>cd</sup>  | -                         |
| G102K4          | 2.22 ± 0.09 <sup>abcdefgkh</sup>      | 3.46 ± 0.21 <sup>ghijklmno</sup>        | 1.41 ± 0.02 <sup>abwxyz</sup>  | -                           | -                          | 1.67 ± 0.01 <sup>ns</sup> |
| G105K2          | -                                     | 2.00 ± 0.11 <sup>abqrstuvwxyz</sup>     | 1.43 ± 0.08 <sup>abwxyz</sup>  | 2.42 ± 0.11 <sup>klm</sup>  | 1.79 ± 0.15 <sup>ghi</sup> | -                         |
| G105K3          | 3.51 ± 0.48 <sup>ghijklmnopqrs</sup>  | -                                       | -                              | 4.46 ± 0.20 <sup>ghij</sup> | 3.92 ± 0.34 <sup>abc</sup> | -                         |

| ISOLATE /ENZYME | PROTEASE                              | LIPASE                                   | AMYLASE                         | CELLULASE                   | PECTINASE                   | XYLANASE                  |
|-----------------|---------------------------------------|------------------------------------------|---------------------------------|-----------------------------|-----------------------------|---------------------------|
| G105S1          | -                                     | -                                        | -                               | -                           | -                           | -                         |
| G105Y1          | 7.29 ± 0.71 <sup>a</sup>              | 1.87 ± 0.34 <sup>abstuvwxyz</sup>        | 3.03 ± 0.29 <sup>def</sup>      | 12.75 ± 1.38 <sup>a</sup>   | 3.81 ± 0.38 <sup>abcd</sup> | -                         |
| G106K1          | 2.68 ± 0.06 <sup>abcdefvwxyz</sup>    | -                                        | 2.50 ± 0.13 <sup>hijklmn</sup>  | -                           | -                           | -                         |
| G106S1          | 3.16 ± 0.04 <sup>lmnopqrstuvw</sup>   | 1.67 ± 0.08 <sup>abuvwxyz</sup>          | -                               | -                           | -                           | -                         |
| G106S2          | 3.72 ± 0.29 <sup>ghijklmno</sup>      | 2.72 ± 0.18 <sup>lmnopqrstuvwxyz</sup>   | 1.96 ± 0.07 <sup>pqrstu</sup>   | -                           | -                           | -                         |
| G106Y1          | 3.81 ± 0.16 <sup>efghijklm</sup>      | -                                        | -                               | 4.89 ± 0.20 <sup>ghi</sup>  | 2.24 ± 0.11 <sup>fgh</sup>  | -                         |
| G107K1          | -                                     | 2.41 ± 0.14 <sup>abmnopqrstuvwxyz</sup>  | -                               | -                           | -                           | -                         |
| G107S1          | -                                     | 2.80 ± 0.28 <sup>klmnopqrstuvwxy</sup>   | -                               | 2.70 ± 0.71 <sup>jklm</sup> | -                           | 1.64 ± 0.32 <sup>ns</sup> |
| G107S2          | 3.08 ± 0.03 <sup>mnpqrstuvwxy</sup>   | 1.94 ± 0.05 <sup>abrstuvwxyz</sup>       | 1.19 ± 0.03 <sup>abz</sup>      | -                           | -                           | -                         |
| G107Y1          | 2.20 ± 0.18 <sup>cdefghijk</sup>      | 2.92 ± 0.38 <sup>klmnopqrstuvw</sup>     | 1.44 ± 0.08 <sup>abvwxyz</sup>  | -                           | -                           | 2.88 ± 0.13 <sup>ns</sup> |
| G107Y2          | 3.26 ± 0.09 <sup>klmnopqrstuv</sup>   | 7.33 ± 0.67 <sup>b</sup>                 | 2.68 ± 0.27 <sup>ghijkl</sup>   | 4.95 ± 0.30 <sup>ghi</sup>  | -                           | -                         |
| G108S2          | -                                     | 2.56 ± 0.38 <sup>ablmnopqrstuvwxyz</sup> | 2.27 ± 0.13 <sup>klmnopq</sup>  | -                           | 1.46 ± 0.10 <sup>ghi</sup>  | -                         |
| G111K1          | -                                     | 3.63 ± 0.10 <sup>ghijklmn</sup>          | -                               | -                           | -                           | -                         |
| G111K2          | 3.10 ± 0.14 <sup>mnpqrstuvwxy</sup>   | 2.35 ± 0.06 <sup>abmnopqrstuvwxyz</sup>  | 1.11 ± 0.01 <sup>b</sup>        | -                           | -                           | -                         |
| G111K3          | 3.09 ± 0.04 <sup>mnpqrstuvwxy</sup>   | 2.32 ± 0.06 <sup>abmnopqrstuvwxyz</sup>  | 1.47 ± 0.05 <sup>abvwxyz</sup>  | -                           | -                           | -                         |
| G111S1          | -                                     | 2.56 ± 0.07 <sup>ablmnopqrstuvwxyz</sup> | 2.32 ± 0.16 <sup>jklmnopq</sup> | 4.05 ± 0.25 <sup>hijk</sup> | -                           | -                         |
| G112K3          | 2.87 ± 0.16 <sup>abcdqrstuvwxyz</sup> | 1.26 ± 0.02 <sup>ab</sup>                | -                               | -                           | -                           | -                         |
| G113K1          | 3.17 ± 0.28 <sup>lmnopqrstuvw</sup>   | 2.12 ± 0.03 <sup>abopqrstuvwxyz</sup>    | 1.36 ± 0.02 <sup>abxyz</sup>    | -                           | -                           | -                         |
| G113K2          | 2.13 ± 0.02 <sup>efghijk</sup>        | 1.60 ± 0.05 <sup>abvwxyz</sup>           | -                               | -                           | -                           | -                         |
| G113S1          | 4.02 ± 0.20 <sup>defghij</sup>        | 2.96 ± 0.56 <sup>jklmnopqrstuvw</sup>    | 2.42 ± 0.09 <sup>jklmnop</sup>  | -                           | -                           | -                         |
| G113S2          | 3.27 ± 0.08 <sup>klmnopqrstuv</sup>   | 2.23 ± 0.14 <sup>abopqrstuvwxyz</sup>    | 2.54 ± 0.09 <sup>ghijklmn</sup> | -                           | -                           | -                         |
| G113S2T         | -                                     | 1.99 ± 0.25 <sup>abrstuvwxyz</sup>       | -                               | -                           | -                           | -                         |
| G113Y2          | 3.33 ± 0.15 <sup>jklmnopqrstuv</sup>  | 2.49 ± 0.17 <sup>abmnopqrstuvwxyz</sup>  | 1.54 ± 0.10 <sup>abuvwxyz</sup> | -                           | -                           | -                         |
| G113Y3          | 5.12 ± 0.07 <sup>b</sup>              | 3.15 ± 0.13 <sup>hijklmnopqrs</sup>      | 4.70 ± 0.17 <sup>ab</sup>       | 9.77 ± 0.42 <sup>bc</sup>   | 3.48 ± 0.29 <sup>bcd</sup>  | 1.75 ± 0.25 <sup>ns</sup> |

| ISOLATE /ENZYME | PROTEASE                              | LIPASE                                  | AMYLASE                         | CELLULASE                   | PECTINASE                   | XYLANASE                  |
|-----------------|---------------------------------------|-----------------------------------------|---------------------------------|-----------------------------|-----------------------------|---------------------------|
| G114S1T         | 3.78 ± 0.17 <sup>efghijklmn</sup>     | -                                       | -                               | 9.53 ± 0.64 <sup>bc</sup>   | 3.46 ± 0.38 <sup>bcd</sup>  | -                         |
| G114Y1          | 4.41 ± 0.37 <sup>cdef</sup>           | 2.71 ± 0.28 <sup>lmnopqrstuvwxyz</sup>  | -                               | 10.00 ± 0.68 <sup>bc</sup>  | 3.78 ± 0.22 <sup>abcd</sup> | -                         |
| G114Y2          | -                                     | -                                       | -                               | -                           | -                           | -                         |
| G114Y2T         | -                                     | -                                       | -                               | -                           | -                           | -                         |
| G114Y3          | -                                     | -                                       | -                               | 6.15 ± 1.35 <sup>efg</sup>  | 2.94 ± 0.11 <sup>def</sup>  | -                         |
| G115K1T         | 2.19 ± 0.67 <sup>defghijk</sup>       | 2.64 ± 0.12 <sup>lmnopqrstuvwxyz</sup>  | -                               | -                           | -                           | -                         |
| G116K1T         | 4.68 ± 0.25 <sup>bcd</sup>            | 1.91 ± 0.18 <sup>abstuvwxyz</sup>       | -                               | -                           | -                           | -                         |
| G116S1          | -                                     | -                                       | -                               | -                           | -                           | -                         |
| G116S1T         | 1.51 ± 0.13 <sup>k</sup>              | 1.36 ± 0.10 <sup>abz</sup>              | -                               | -                           | -                           | -                         |
| G116S2          | 3.97 ± 0.22 <sup>defghijk</sup>       | -                                       | -                               | -                           | 3.48 ± 0.13 <sup>bcd</sup>  | -                         |
| G116S2T         | 4.15 ± 0.22 <sup>cdefgh</sup>         | -                                       | -                               | 8.29 ± 0.26 <sup>cd</sup>   | 3.07 ± 0.14 <sup>cde</sup>  | -                         |
| G117K1          | -                                     | 2.67 ± 0.28 <sup>lmnopqrstuvwxyz</sup>  | 1.86 ± 0.12 <sup>qrstuvw</sup>  | -                           | -                           | -                         |
| G117Y1T         | 3.22 ± 0.13 <sup>lmnopqrstuvw</sup>   | 6.32 ± 1.78 <sup>cb</sup>               | 2.81 ± 0.01 <sup>defghi</sup>   | 2.46 ± 0.12 <sup>klm</sup>  | -                           | 1.90 ± 0.27 <sup>ns</sup> |
| G118K1          | 3.46 ± 0.11 <sup>hijklmnopqrstu</sup> | 2.68 ± 0.08 <sup>lmnopqrstuvwxyz</sup>  | 1.85 ± 0.06 <sup>qrstuvw</sup>  | -                           | 1.41 ± 0.01 <sup>hi</sup>   | -                         |
| G118K1T         | -                                     | 1.82 ± 0.12 <sup>abstuvwxyz</sup>       | 1.59 ± 0.25 <sup>atuvwxyz</sup> | 8.48 ± 0.62 <sup>cd</sup>   | -                           | -                         |
| G118S1          | 4.38 ± 0.40 <sup>cdef</sup>           | 3.86 ± 0.65 <sup>efghijkl</sup>         | 2.87 ± 0.34 <sup>defghi</sup>   | -                           | -                           | -                         |
| G118S1T         | -                                     | -                                       | -                               | -                           | -                           | -                         |
| G118S2T         | 4.22 ± 0.16 <sup>cdefg</sup>          | 4.46 ± 0.22 <sup>defg</sup>             | 1.69 ± 0.08 <sup>rstuvw</sup>   | 3.46 ± 0.19 <sup>ijkl</sup> | -                           | 2.65 ± 0.41 <sup>ns</sup> |
| G118Y1T         | 1.94 ± 0.13 <sup>ghijk</sup>          | 2.62 ± 0.22 <sup>almnopqrstuvwxyz</sup> | 1.16 ± 0.02 <sup>abz</sup>      | 4.01 ± 0.54 <sup>hijk</sup> | -                           | -                         |
| G119S1          | 2.06 ± 0.23 <sup>efghijk</sup>        | 1.35 ± 0.07 <sup>abz</sup>              | -                               | -                           | -                           | -                         |
| G119Y1T         | -                                     | 4.37 ± 0.15 <sup>efgh</sup>             | 1.29 ± 0.04 <sup>abxyz</sup>    | 7.50 ± 0.00 <sup>de</sup>   | -                           | -                         |
| G119Y2T         | -                                     | 4.37 ± 0.15 <sup>efgh</sup>             | 2.59 ± 0.25 <sup>ghijklm</sup>  | 2.08 ± 0.21 <sup>lm</sup>   | -                           | -                         |
| G120S1          | 2.50 ± 0.12 <sup>abcdewgxyz</sup>     | -                                       | 1.60 ± 0.04 <sup>tuvwxyz</sup>  | -                           | -                           | -                         |
| G120S2          | -                                     | -                                       | -                               | 4.20 ± 0.34 <sup>hijk</sup> | 3.07 ± 0.14 <sup>cde</sup>  | -                         |

| ISOLATE /ENZYME | PROTEASE                             | LIPASE                                  | AMYLASE                        | CELLULASE                             | PECTINASE                             | XYLANASE |
|-----------------|--------------------------------------|-----------------------------------------|--------------------------------|---------------------------------------|---------------------------------------|----------|
| G120S3          | 2.93 ± 0.11 <sup>abqstuwxyz</sup>    | 1.53 ± 0.16 <sup>abxyz</sup>            | -                              | -                                     | -                                     | -        |
| G42K2           | 3.57 ± 0.20 <sup>gijklmnopq</sup>    | 4.89 ± 0.22 <sup>def</sup>              | 2.68 ± 0.09 <sup>fghijk</sup>  | 2.66 ± 0.04 <sup>ijklm</sup>          | 1.76 ± 0.14 <sup>gh<sup>1</sup></sup> | -        |
| G68K2           | -                                    | 3.61 ± 0.94 <sup>fghijklm</sup>         | 5.00 ± 0.00 <sup>a</sup>       | -                                     | -                                     | -        |
| G68K3           | -                                    | 4.59 ± 0.34 <sup>defg</sup>             | 4.02 ± 0.19 <sup>c</sup>       | 5.10 ± 0.33 <sup>gh<sup>1</sup></sup> | -                                     | -        |
| G69S1           | -                                    | 5.01 ± 0.32 <sup>de</sup>               | 3.95 ± 0.25 <sup>c</sup>       | 3.65 ± 0.37 <sup>hijkl</sup>          | -                                     | -        |
| G69S2           | -                                    | 4.36 ± 0.66 <sup>efgh</sup>             | 4.79 ± 0.13 <sup>ab</sup>      | 1.93 ± 0.07 <sup>lm</sup>             | -                                     | -        |
| G70K2           | 2.73 ± 0.34 <sup>abcdefuwxyz</sup>   | 7.24 ± 0.78 <sup>b</sup>                | 2.69 ± 0.04 <sup>fghijk</sup>  | 4.07 ± 0.13 <sup>hijk</sup>           | 2.34 ± 0.18 <sup>efg</sup>            | -        |
| G71K1           | 1.64 ± 0.05 <sup>ijk</sup>           | 1.84 ± 0.33 <sup>abstuvwxyz</sup>       | -                              | -                                     | -                                     | -        |
| G72S1           | 4.01 ± 0.19 <sup>defghij</sup>       | 2.38 ± 0.03 <sup>abmnopqrstuvwxyz</sup> | 1.25 ± 0.01 <sup>abxyz</sup>   | -                                     | -                                     | -        |
| G75K1           | 3.85 ± 0.18 <sup>efghijkl</sup>      | 9.38 ± 0.31 <sup>a</sup>                | 3.80 ± 0.17 <sup>c</sup>       | -                                     | -                                     | -        |
| G75K2           | -                                    | -                                       | 4.49 ± 0.05 <sup>b</sup>       | 3.42 ± 0.26 <sup>ijkl</sup>           | -                                     | -        |
| G79K1           | 3.28 ± 0.25 <sup>klmnopqrstuv</sup>  | -                                       | 2.44 ± 0.04 <sup>ijklmno</sup> | -                                     | -                                     | -        |
| G79K2           | -                                    | 1.24 ± 0.02 <sup>b</sup>                | -                              | -                                     | -                                     | -        |
| G79K3           | 3.97 ± 0.18 <sup>defghijk</sup>      | -                                       | 1.89 ± 0.04 <sup>qrstuv</sup>  | -                                     | 2.10 ± 0.10 <sup>gh<sup>1</sup></sup> | -        |
| G79S1           | 2.75 ± 0.03 <sup>abcdeftuvwxyz</sup> | -                                       | -                              | -                                     | -                                     | -        |
| G79Y1           | 1.85 ± 0.09 <sup>ghijk</sup>         | 3.04 ± 0.17 <sup>ijklmnopqrst</sup>     | 2.25 ± 0.15 <sup>klmnopq</sup> | -                                     | -                                     | -        |
| G79Y2           | 4.13 ± 0.14 <sup>defgh</sup>         | 2.67 ± 0.25 <sup>lmnopqrstuvwxyz</sup>  | 1.67 ± 0.03 <sup>stuvwxy</sup> | 3.35 ± 0.12 <sup>ijklm</sup>          | 1.63 ± 0.03 <sup>gh<sup>1</sup></sup> | -        |
| G79Y3           | 2.80 ± 0.14 <sup>abcdestuvwxyz</sup> | -                                       | -                              | -                                     | -                                     | -        |
| G79Y4           | 4.48 ± 0.22 <sup>cde</sup>           | -                                       | 2.95 ± 0.08 <sup>defgh</sup>   | -                                     | -                                     | -        |
| G80K1           | 2.30 ± 0.14 <sup>abcdefghxyz</sup>   | 4.09 ± 0.26 <sup>efghijk</sup>          | 1.40 ± 0.08 <sup>abwxyz</sup>  | 2.79 ± 0.09 <sup>ijklm</sup>          | -                                     | -        |
| G80K3           | 4.03 ± 0.17 <sup>defghij</sup>       | -                                       | 3.05 ± 0.13 <sup>def</sup>     | -                                     | 4.44 ± 0.90 <sup>a</sup>              | -        |
| G80S1           | -                                    | -                                       | 3.80 ± 0.08 <sup>c</sup>       | 7.27 ± 1.05 <sup>de</sup>             | -                                     | -        |
| G81K1           | 1.62 ± 0.03 <sup>ijk</sup>           | 1.51 ± 0.04 <sup>abxyz</sup>            | -                              | -                                     | -                                     | -        |
| G81K2           | -                                    | -                                       | 1.21 ± 0.05 <sup>abyz</sup>    | 3.57 ± 0.05 <sup>ijkl</sup>           | -                                     | -        |

| ISOLATE /ENZYME | PROTEASE                              | LIPASE                                 | AMYLASE                         | CELLULASE                    | PECTINASE                  | XYLANASE                  |
|-----------------|---------------------------------------|----------------------------------------|---------------------------------|------------------------------|----------------------------|---------------------------|
| G81Y1           | -                                     | 2.07 ± 0.14 <sup>abpqrstuvwxy</sup>    | 2.99 ± 0.06 <sup>defg</sup>     | 5.51 ± 0.58 <sup>fgh</sup>   | 1.57 ± 0.14 <sup>ghi</sup> | -                         |
| G82K2           | -                                     | -                                      | 2.22 ± 0.08 <sup>lmnopq</sup>   | -                            | -                          | -                         |
| G82S1           | 3.34 ± 0.04 <sup>ijklmnopqrstuv</sup> | 2.75 ± 0.15 <sup>lmnopqrstuvwxy</sup>  | -                               | -                            | -                          | -                         |
| G82S2           | 3.31 ± 0.03 <sup>ijklmnopqrstuv</sup> | 2.62 ± 0.07 <sup>almnopqrstuvwxy</sup> | 1.51 ± 0.23 <sup>abuvwxyz</sup> | -                            | 1.91 ± 0.09 <sup>ghi</sup> | -                         |
| G82Y1           | 1.86 ± 0.16 <sup>ghijk</sup>          | 2.35 ± 0.24 <sup>abmnopqrstuvwxy</sup> | -                               | -                            | -                          | -                         |
| G83K1           | 3.55 ± 0.16 <sup>ghijklmnopqr</sup>   | 2.19 ± 0.20 <sup>abopqrstuvwxy</sup>   | 1.37 ± 0.02 <sup>abxyz</sup>    | -                            | -                          | -                         |
| G83S1           | 1.65 ± 0.04 <sup>ijk</sup>            | -                                      | -                               | -                            | -                          | -                         |
| G83S2           | 3.05 ± 0.24 <sup>nopqrstuvw</sup>     | 2.29 ± 0.10 <sup>abnopqrstuvwxy</sup>  | 1.13 ± 0.02 <sup>ab</sup>       | -                            | -                          | -                         |
| G83S3           | 2.85 ± 0.05 <sup>abcdqrstuvwxy</sup>  | 3.67 ± 0.15 <sup>fghijklm</sup>        | 3.91 ± 0.37 <sup>c</sup>        | 4.40 ± 0.10 <sup>ghij</sup>  | 2.05 ± 0.05 <sup>ghi</sup> | -                         |
| G84K1           | -                                     | 1.49 ± 0.03 <sup>abxyz</sup>           | 2.03 ± 0.13 <sup>opqrst</sup>   | -                            | -                          | -                         |
| G84Y1           | 1.54 ± 0.02 <sup>jk</sup>             | -                                      | -                               | -                            | -                          | -                         |
| G85K2           | 3.49 ± 0.04 <sup>hijklmnopqrst</sup>  | -                                      | -                               | -                            | -                          | -                         |
| G85K3           | 2.94 ± 0.16 <sup>aqrstuvwxy</sup>     | 4.32 ± 0.16 <sup>efghi</sup>           | 2.76 ± 0.20 <sup>efghij</sup>   | -                            | -                          | -                         |
| G88K1           | 3.78 ± 0.06 <sup>efghijklmn</sup>     | 1.90 ± 0.11 <sup>abstuvwxy</sup>       | -                               | -                            | -                          | 2.88 ± 0.38 <sup>ns</sup> |
| G88K2           | -                                     | 4.19 ± 0.21 <sup>efghij</sup>          | 2.11 ± 0.09 <sup>nopqrs</sup>   | -                            | 1.27 ± 0.03 <sup>i</sup>   | 2.04 ± 0.66 <sup>ns</sup> |
| G88S1           | 2.22 ± 0.10 <sup>bcdefghijk</sup>     | 5.05 ± 0.83 <sup>de</sup>              | -                               | -                            | 4.25 ± 0.14 <sup>ab</sup>  | -                         |
| G88Y1           | 1.95 ± 0.13 <sup>ghijk</sup>          | 1.54 ± 0.06 <sup>abxyz</sup>           | -                               | -                            | -                          | -                         |
| G90S1           | 2.94 ± 0.08 <sup>abqrstuvwxy</sup>    | 6.79 ± 2.01 <sup>b</sup>               | 3.23 ± 0.09 <sup>d</sup>        | 5.02 ± 0.27 <sup>ghi</sup>   | -                          | -                         |
| G90Y1           | -                                     | 3.30 ± 0.23 <sup>ghijklmnopqr</sup>    | 2.29 ± 0.20 <sup>klmnopq</sup>  | -                            | -                          | -                         |
| G90Y2           | 3.46 ± 0.15 <sup>hijklmnopqrstu</sup> | 9.80 ± 0.20 <sup>a</sup>               | 2.14 ± 0.03 <sup>mnpq</sup>     | 6.10 ± 0.16 <sup>efg</sup>   | 1.73 ± 0.03 <sup>ghi</sup> | -                         |
| G91K1           | -                                     | 2.04 ± 0.05 <sup>abqrstuvwxy</sup>     | -                               | -                            | -                          | -                         |
| G91S1           | 2.78 ± 0.00 <sup>abcedstuvwxy</sup>   | 2.31 ± 0.16 <sup>abnopqrstuvwxy</sup>  | 2.13 ± 0.13 <sup>nopqr</sup>    | 3.39 ± 0.09 <sup>ijklm</sup> | -                          | -                         |
| G91S2           | -                                     | 1.49 ± 0.06 <sup>abxyz</sup>           | -                               | 4.10 ± 0.06 <sup>hijk</sup>  | -                          | -                         |
| G91S3           | 4.82 ± 0.08 <sup>bc</sup>             | 2.20 ± 0.36 <sup>abopqrstuvwxy</sup>   | 2.00 ± 0.07 <sup>opqrst</sup>   | 10.83 ± 1.46 <sup>b</sup>    | 3.32 ± 0.15 <sup>cd</sup>  | -                         |

| ISOLATE /ENZYME | PROTEASE                               | LIPASE                                  | AMYLASE                                  | CELLULASE                    | PECTINASE                             | XYLANASE                  |
|-----------------|----------------------------------------|-----------------------------------------|------------------------------------------|------------------------------|---------------------------------------|---------------------------|
| G91Y1           | -                                      | -                                       | -                                        | -                            | -                                     | -                         |
| G91Y2           | 1.74 ± 0.10 <sup>hijk</sup>            | 1.35 ± 0.02 <sup>abz</sup>              | -                                        | -                            | -                                     | -                         |
| G92S1           | 2.83 ± 0.02 <sup>abcdeqrstuvwxyz</sup> | 1.93 ± 0.23 <sup>abrstuvwxyz</sup>      | -                                        | -                            | -                                     | -                         |
| G92S2           | -                                      | -                                       | 3.04 ± 0.06 <sup>def</sup>               | -                            | -                                     | -                         |
| G93Y1           | -                                      | -                                       | -                                        | -                            | 1.67 ± 0.19 <sup>gh<sup>1</sup></sup> | -                         |
| G95S1           | -                                      | 3.41 ± 0.07 <sup>ghijklmnop</sup>       | 2.77 ± 0.20 <sup>efghij</sup>            | -                            | 1.67 ± 0.08 <sup>gh<sup>1</sup></sup> | -                         |
| G95Y1           | 3.70 ± 0.75 <sup>fghijklmnop</sup>     | 3.43 ± 0.11 <sup>ghijklmnop</sup>       | 1.32 ± 0.11 <sup>abxyz</sup>             | 3.29 ± 0.35 <sup>ijklm</sup> | -                                     | -                         |
| G95Y2           | -                                      | 2.83 ± 0.24 <sup>klmnopqrstuvwxyz</sup> | 2.79 ± 0.22 <sup>defgh<sup>1</sup></sup> | -                            | -                                     | -                         |
| G96Y1           | 4.33 ± 0.15 <sup>cdef</sup>            | 2.97 ± 0.22 <sup>jklmnopqrstuv</sup>    | 2.64 ± 0.12 <sup>fghijkl</sup>           | -                            | -                                     | -                         |
| G96Y2           | -                                      | 1.60 ± 0.15 <sup>abwxyz</sup>           | -                                        | -                            | -                                     | 1.40 ± 0.15 <sup>ns</sup> |
| G96Y3           | 2.97 ± 0.07 <sup>pqrstuvwxyz</sup>     | 2.01 ± 0.07 <sup>abqrstuvwxyz</sup>     | 1.37 ± 0.01 <sup>abxyz</sup>             | -                            | -                                     | 1.77 ± 0.19 <sup>ns</sup> |
| G99K1           | -                                      | 3.36 ± 0.18 <sup>ghijklmnopq</sup>      | -                                        | 1.54 ± 0.04 <sup>m</sup>     | -                                     | -                         |
| G99K2           | -                                      | 1.91 ± 0.00 <sup>abstuvwxyz</sup>       | -                                        | -                            | -                                     | -                         |
| G99K3           | -                                      | 1.78 ± 0.08 <sup>abstuvwxyz</sup>       | -                                        | 2.80 ± 0.00 <sup>ijklm</sup> | -                                     | -                         |
| G99Y1           | 2.74 ± 0.06 <sup>abcdefuvwxyz</sup>    | 1.69 ± 0.03 <sup>abstuvwxyz</sup>       | -                                        | -                            | -                                     | -                         |
| G99Y2           | -                                      | 1.44 ± 0.04 <sup>abyz</sup>             | -                                        | -                            | -                                     | -                         |

Means of four replicates (Mean ± Std. Errors). Values within a column followed by different lowercase letters are significantly different ( $p < 0.05$ ). ns – not significant
